# Duloxetine for pathological laughing and crying

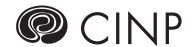

Received 27 April 2009; Reviewed 10 July 2009; Revised 29 July 2009; Accepted 26 August 2009;  
First published online 29 September 2009

Pathological laughing and crying (PLC) is a condition characterized by frequent, sudden outbursts of uncontrollable crying and/or laughing that are disproportionate or incongruent to underlying feelings or external triggers (Wortzel *et al.* 2008). Alternative terms often used to describe this syndrome are pseudo-bulbar affect, emotional incontinence, emotional or affective lability, organic or pathological emotionalism and involuntary emotional expression disorder. The condition is associated with various neurological disorders, such as stroke, multiple sclerosis, Parkinson's disease, traumatic brain injury, dementia and amyotrophic lateral sclerosis (ALS). PLC can be socially and occupationally disabling and is a source of distress for affected patients and their families. However, it is largely under-recognized or misdiagnosed in clinical settings. An important first step in the recognition and accurate measurement of PLC has been accomplished with the introduction of specific rating scales, such as the interviewer administered Pathological Laughter and Crying Scale validated for use with stroke victims (Robinson *et al.* 1993) and the self-report Center for Neurologic Study – Lability Scale (CNS-LS) validated for use with ALS and multiple sclerosis patients (Moore *et al.* 1997). Treatment of the PLC syndrome has included, with varying success, behavioural interventions and pharmacological agents. This case-report highlights the potential usefulness of duloxetine in the treatment of PLC symptoms in ALS, a fatal disorder with a reportedly high prevalence (up to 49%) of PLC.

## Case report

Ms. M, a 52-yr-old female, manifested 18 months ago gradually worsening muscle weakness and wasting in the upper and lower limbs, night cramps, muscle fasciculations, and difficulty walking. One year later, the patient additionally exhibited dysphagia, dysarthria, nasal speech and frequent, unpredictable outbursts of uncontrollable crying or laughing either

spontaneously or in response to non-specific or trivial and often inappropriate emotionally laden stimuli. On presentation, she was depressed, felt helpless, and complained of low energy and non-refreshing sleep. Embarrassment about emotional outbursts had led to social withdrawal. Neurological examination provided evidence of upper and lower motor neuron degeneration (bilateral corticospinal tract signs, peripheral muscle weakness and atrophies, signs of bulbar palsy, no sensory changes). Electromyography displayed widespread fibrillations and fasciculations, i.e. active denervation, in all four limbs, paraspinal and facial muscles with normal nerve conduction studies. Brain and cervical spine MRI scans as well as routine laboratory tests provided no evidence of other disease processes that might explain the observed clinical and electrophysiological signs; therefore, a diagnosis of ALS was made (Brooks *et al.* 2000). The patient had no symptoms of cognitive dysfunction (Mini-Mental State Examination score 29/30) but scored 23 on the 17-item Hamilton Depression Rating Scale (HAMD<sub>17</sub>). The severity of PLC symptoms was measured with the CNS-LS, which comprises seven items rated from 1 'never applies' to 5 'applies most of the time' and includes a 4-item labile laughter (LL) subscale and a 3-item labile tearfulness (LT) subscale; a total score of 24 was recorded with respective subscale scores of 11 and 13 (crying outbursts prevailed). A previous 3-month trial with 20 mg/d citalopram prescribed by a general practitioner only minimally alleviated depressive and PLC symptoms and had been discontinued. Duloxetine (60 mg/d) was initiated. One week later, the patient had impressive improvement in PLC symptoms, especially in crying spells; affective outbursts became much rarer, briefer and less intense (CNS-LS score 14; LL 8, LT 6). Six weeks after treatment initiation, her mood, sleep and overall functioning were considerably improved (HAMD<sub>17</sub> score 10) and PLC symptoms were further relieved (CNS-LS score 10; LL 6, LT 4).

The basic mechanisms implicated in affective lability are not well understood. Presumably, PLC results from interruption of cortical inhibition of postulated laughing and crying centres in the upper brainstem or from lesions in the cerebro-ponto-cerebellar pathways involved in appropriate

Address for correspondence: P. Ferentinos, M.D., Athens University Medical School, 1st Department of Psychiatry, Eginition Hospital, 74 Vas. Sophias Ave, 11528 Athens, Greece.  
Tel.: +30 (210) 7289324 Fax: +30 (210) 7289324  
Email: pferentinos@med.uoa.gr

adjustment to social/cognitive context. Furthermore, the monoaminergic neurotransmitter systems, which appear to be implicated in the regulation of both mood and affective expressions, are thought to have a role in the manifestation of PLC episodes (Wortzel *et al.* 2008). Although both depression and PLC, especially crying spells, are highly responsive to serotonergic agents, PLC usually responds first to treatment (often in 1–3 d); this difference in response rates suggests that PLC and depression are distinct entities, although they frequently co-occur in neurological disease (Nahas *et al.* 1998).

Selective serotonin reuptake inhibitors (SSRIs) are recommended as first-line pharmacotherapy for PLC (Nahas *et al.* 1998). When SSRIs are ineffective or poorly tolerated, agents acting solely or additionally on the noradrenergic and/or dopaminergic neurotransmitter systems, such as nortriptyline (Robinson *et al.* 1993) and other tricyclic antidepressants, L-dopa (Udaka *et al.* 1984), psychostimulants (methylphenidate, dextromethorphan/quinidine; Rosen, 2008), lamotrigine (Ramasubbu, 2003) and novel dual-action antidepressants [venlafaxine (Smith *et al.* 2003), mirtazapine (Kim *et al.* 2005)] have been reported as second-line PLC treatments. Therefore, it is not surprising that duloxetine, a novel serotonin norepinephrine reuptake inhibitor (SNRI), acted rapidly and was highly effective in the treatment of PLC symptoms, in particular pathological crying, in the present case.

Further controlled studies are warranted to investigate the efficacy of duloxetine in the management of PLC symptoms, as well as its differential effect on crying *vs.* laughing outbursts in patients with ALS or other neurological disorders, with or without comorbid depression. Finally, it is unknown whether duloxetine or other dual-action antidepressants are better than SSRIs for PLC treatment in a subgroup of patients with specific biological or clinical characteristics.

### Acknowledgements

None.

### Statement of Interest

None.

### References

- Brooks BR, Miller RG, Swash M, Munsat TL, World Federation of Neurology Research Group on Motor Neuron Diseases (2000). El Escorial revisited: revised criteria for the diagnosis of amyotrophic lateral sclerosis. *Amyotrophic Lateral Sclerosis and Other Motor Neuron Disorders* **1**, 293–299.
- Kim SW, Shin IS, Kim JM, Lim SY, *et al.* (2005). Mirtazapine treatment for pathological laughing and crying after stroke. *Clinical Neuropharmacology* **28**, 249–251.
- Moore SR, Gresham LS, Bromberg MB, Kasarkis EJ, Smith RA (1997). A self report measure of affective lability. *Journal of Neurology, Neurosurgery and Psychiatry* **63**, 89–93.
- Nahas Z, Arlinghaus KA, Kotrla KJ, Clearman RR, George MS (1998). Rapid response of emotional incontinence to selective serotonin reuptake inhibitors. *Journal of Neuropsychiatry and Clinical Neurosciences* **10**, 453–455.
- Ramasubbu R (2003). Lamotrigine treatment for post-stroke pathological laughing and crying. *Clinical Neuropharmacology* **26**, 233–235.
- Robinson RG, Parikh RM, Lipsey JR, Starkstein SE, Price TR (1993). Pathological laughing and crying following stroke: validation of a measurement scale and a double-blind treatment study. *American Journal of Psychiatry* **150**, 286–293.
- Rosen H (2008). Dextromethorphan/quinidine sulfate for pseudobulbar affect. *Drugs Today (Barcelona)* **44**, 661–668.
- Smith AG, Montealegre-Orjuela M, Douglas JE, Jenkins EA (2003). Venlafaxine for pathological crying after stroke. *Journal of Clinical Psychiatry* **64**, 731–732.
- Udaka F, Yamao S, Nagata H, Nakamura S, Kameyama M (1984). Pathologic laughing and crying treated with levodopa. *Archives of Neurology* **41**, 1095–1096.
- Wortzel HS, Oster TJ, Anderson CA, Arciniegas DB (2008). Pathological laughing and crying: epidemiology, pathophysiology and treatment. *CNS Drugs* **22**, 531–545.
- Panagiotis Ferentinos<sup>1</sup>, Thomas Paparrigopoulos<sup>1</sup>, Michael Rentzos<sup>2</sup>, Ioannis Evdokimidis<sup>2</sup>  
<sup>1</sup> University of Athens, 1st Department of Psychiatry, Eginition Hospital, Athens, Greece  
<sup>2</sup> University of Athens, 1st Department of Neurology, Eginition Hospital, Athens, Greece
